# Supplementary material
Source: HighWire-hosted journal article supplement (https://bmjopenquality.bmj.com/content/8/3/e000504)
Supplement: inline-supplementary-material-3 [file inline-supplementary-material-3.pdf]

| <b>Intervention / Measure</b>                                                          | <b>Baseline</b> | <b>Sustainment</b> |
|----------------------------------------------------------------------------------------|-----------------|--------------------|
| Phone Assigned to Providers and Nurses                                                 | 40%             | 100%               |
| Triage Chief Complaint Comments Use                                                    | 28%             | 94%                |
| Whiteboard Use                                                                         | 0%              | 65%                |
| Families' Ability to Identify Care Providers ( <i>Whiteboard Use Outcome measure</i> ) | 67%             | 88%                |
| Families' Knowledge of Next Steps in Care ( <i>Whiteboard Use Outcome Measure</i> )    | 70%             | 78%                |
| Call lights pushed per hour ( <i>Whiteboard Use Balancing Measure</i> )                | 2.1             | 0.3                |
