# Supplementary material
Source: HighWire-hosted journal article supplement (https://bmjopenquality.bmj.com/content/8/3/e000504)

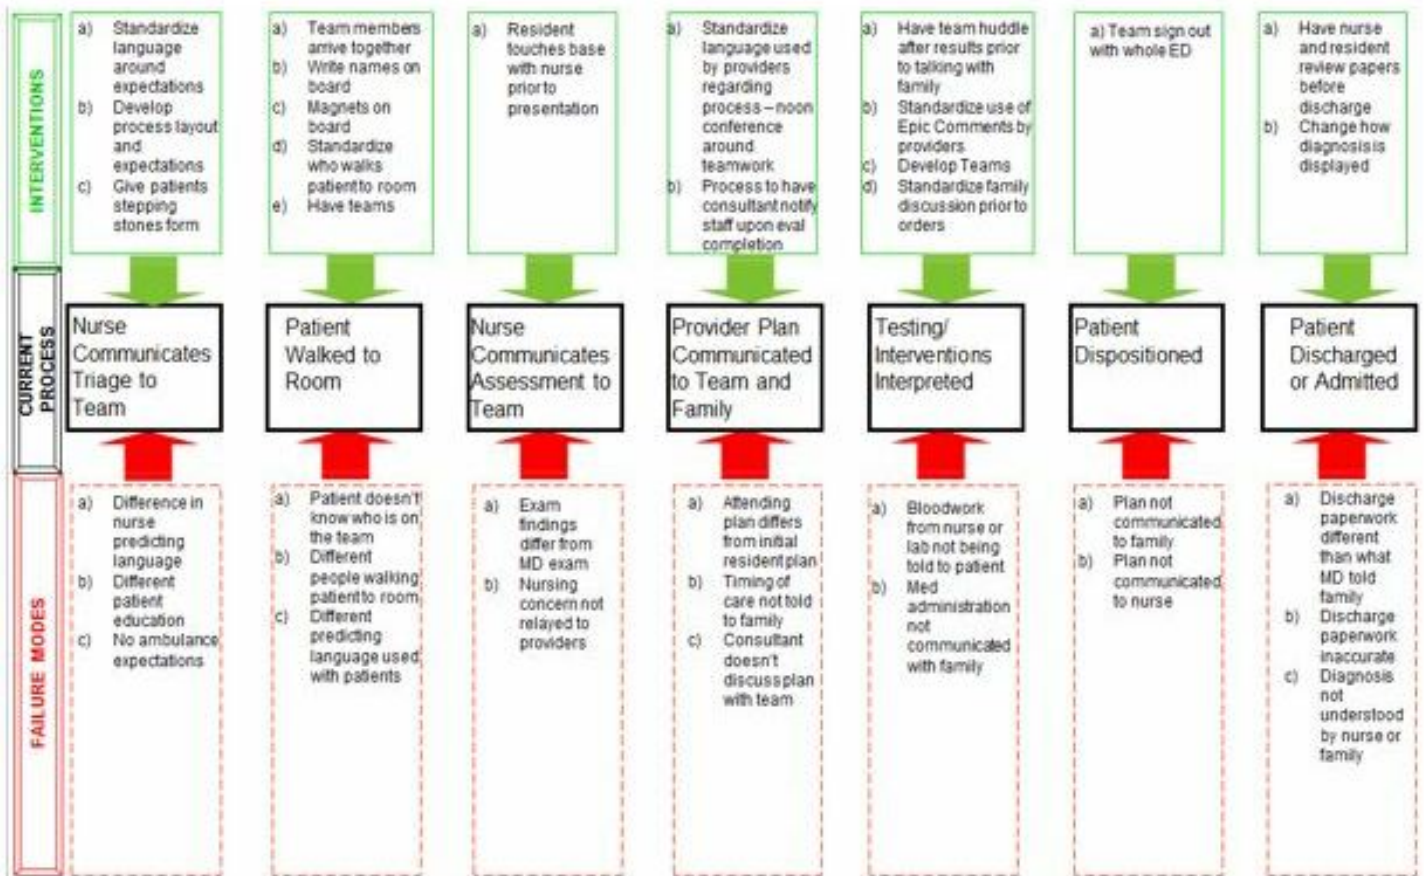

Supplement: inline-supplementary-material-1 [file inline-supplementary-material-1.pdf]

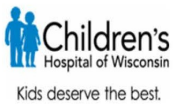

# Stepping Stones through the Emergency Room for:

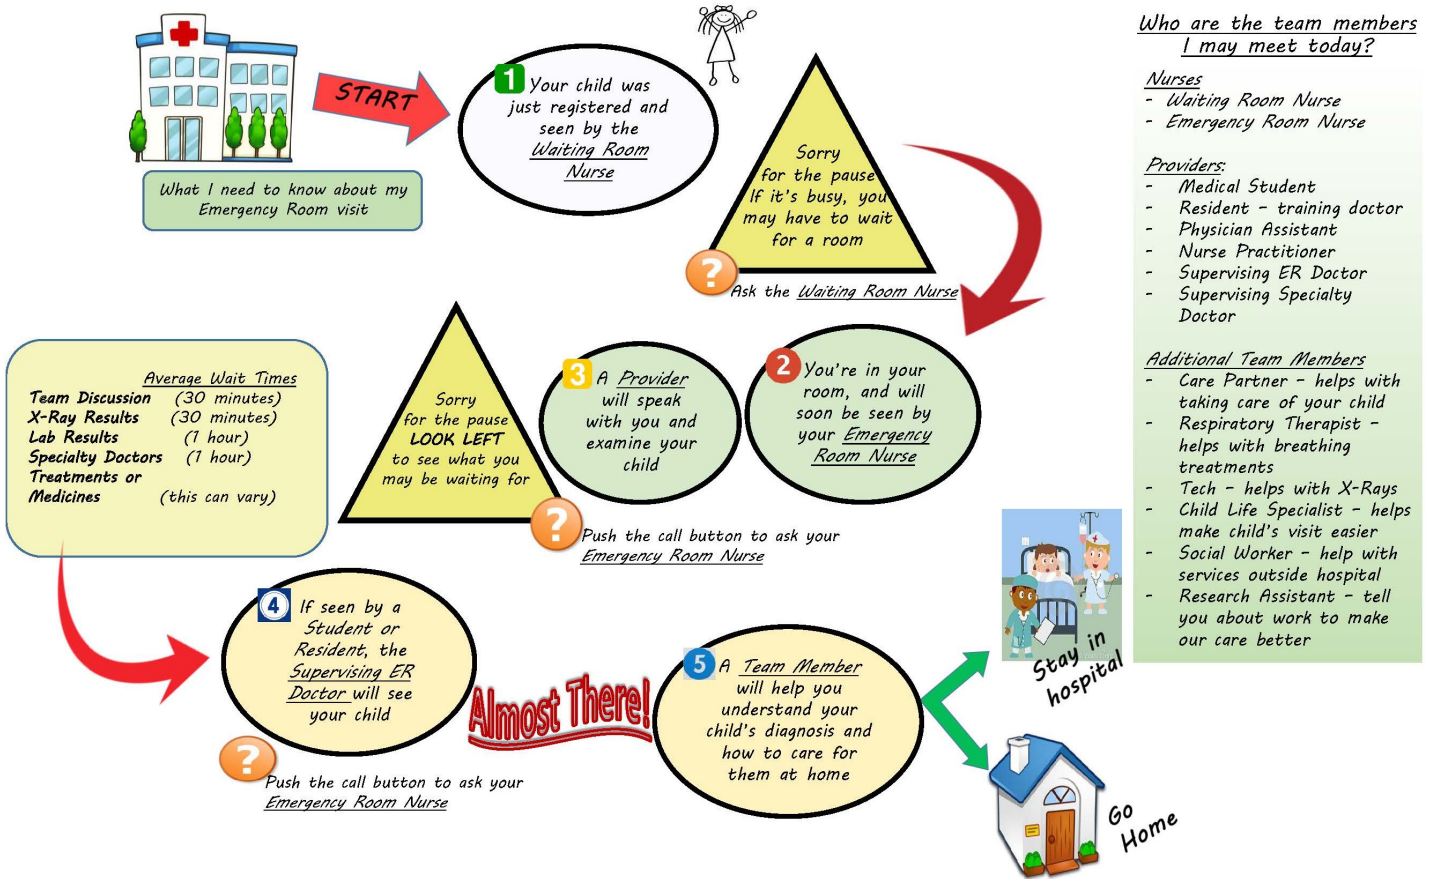

Supplement: inline-supplementary-material-4 [file inline-supplementary-material-4.pdf]

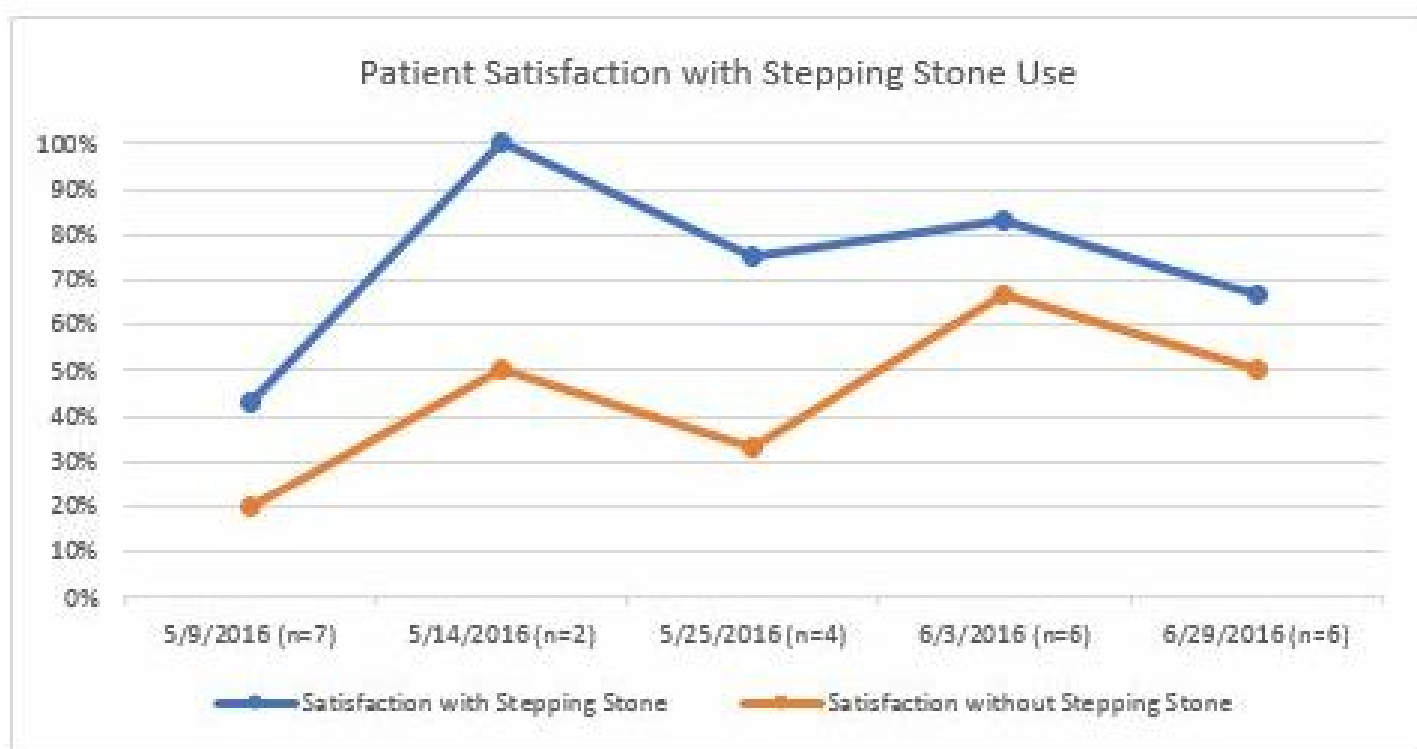

Supplement: inline-supplementary-material-5 [file inline-supplementary-material-5.pdf]
